# Supplementary material
Source: PubMed Central journal article supplement (PMC3463622)

Supplemental Figure 1

**PF**

PV

100  $\mu$ m

**AF**

PV

100  $\mu$ m

**AF+Leptin**

PV

100  $\mu$ m

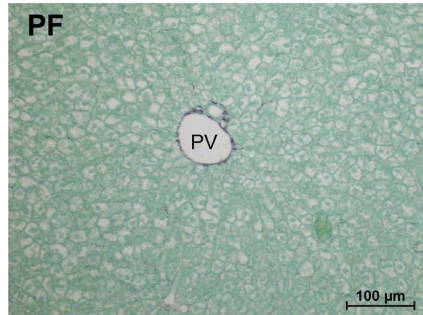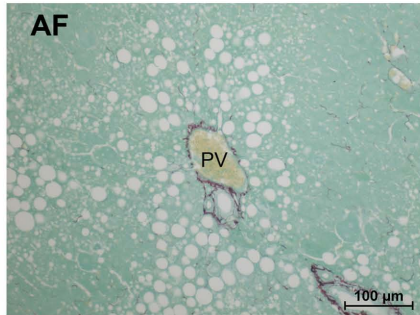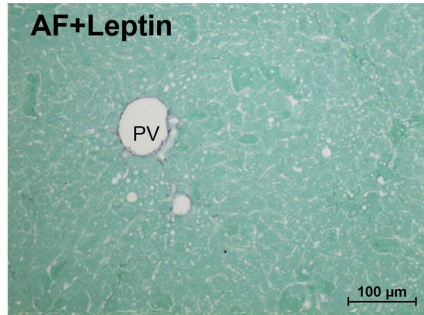

Supplement: mmc1.pdf [file mmc1.pdf]
